# Supplementary material for: Technical note: Conversion of isoprene hydroxy hydroperoxides (ISOPOOHs) on metal environmental simulation chamber walls
Source: Copernicus journal article supplement (doi:10.5194/acp-17-4053-2017), 2017-03-24
Supplement: Supplementary file 1 [file acp-17-4053-2017-supplement.pdf]

Supplement of Atmos. Chem. Phys., 17, 4053–4062, 2017  
<http://www.atmos-chem-phys.net/17/4053/2017/>  
doi:10.5194/acp-17-4053-2017-supplement  
© Author(s) 2017. CC Attribution 3.0 License.

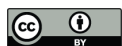

Atmospheric  
Chemistry  
and Physics  
Open Access  
EGU

*Supplement of*

## **Technical note: Conversion of isoprene hydroxy hydroperoxides (ISOPOOHs) on metal environmental simulation chamber walls**

**Anne-Kathrin Bernhammer et al.**

*Correspondence to:* Armin Hansel ([armin.hansel@uibk.ac.at](mailto:armin.hansel@uibk.ac.at))

The copyright of individual parts of the supplement might differ from the CC-BY 3.0 licence.

**Table S1: Structures and names according to the MCM Leeds as used in this paper**

| MCM Nomenclature                        | Structure | MCM Nomenclature       | Structure |
|-----------------------------------------|-----------|------------------------|-----------|
| C5H8 (isoprene)                         |           | HCHO (formaldehyde)    |           |
| MVK (methyl vinyl ketone)               |           | MACR (methacrolein)    |           |
| MVKOO                                   |           | MACROO                 |           |
| ISOPBO                                  |           | ISOPDO                 |           |
| ISOPBO2                                 |           | ISOPDO2                |           |
| ISOPBOOH (1,2-ISOPOOH)                  |           | ISOPDOOH (4,3-ISOPOOH) |           |
| IEPOXB ( <i>trans</i> - $\beta$ -IEPOX) |           |                        |           |
